# Supplementary material for: A New Role for Translation Initiation Factor 2 in Maintaining Genome Integrity
Source: PubMed Central journal article supplement (PMC3334882; doi:10.1371/journal.pgen.1002648), 2012-04-19
Supplement: pgen.1002648.s007.pdf [file pgen.1002648.s007.pdf]

Table S2. PCR primers.

| Primer                            | Sequence                                                         |
|-----------------------------------|------------------------------------------------------------------|
| <b>ChIP analysis:</b>             |                                                                  |
| upperThrAq                        | ggtacatcagtggaatgcagaac                                          |
| lowerThrAq                        | cttctaatacggccataatgg                                            |
| upperPyrD                         | gaagcactggtgcggcagaa                                             |
| lowerPyrD                         | accttcggcatctaccagacgaa                                          |
| upperSerA                         | acccatctggcggaagttg                                              |
| lowerSerA                         | caggagaatatcgccctggaagt                                          |
| upperMuLq                         | accgggaggacattggattattcg                                         |
| lowerMuLq                         | gttatcggtttgaacgttttgaagct                                       |
| upperMuCq                         | gctggtttaacccgatgaaatg                                           |
| lowerMuCq                         | cagcgcagcaaggcggatt                                              |
| upperMuRq2                        | cgattaagcaggtggacaacga                                           |
| lowerMuRq2                        | ctgcttttattcattacatggggatca                                      |
| <b>Transposon recombineering:</b> |                                                                  |
| lowerMod6Tn                       | caaccctgaagctcttggctagtcgta                                      |
| antiSqRP ( <i>p<sub>4</sub></i> ) | ttctcgggtgttctcgcattggctc                                        |
| DelMOD6Cat                        | caaccctgaagctcttggctagtcgtagtcgttggcgataccgggaagccctgggccaact    |
| upperKanCat                       | atgaattgtctcaaaatctctgatgttacattgcacaagataccgggaagccctgggccaact  |
| lowerKanCat                       | aaggacaattacaacaggaatcgaatgcaaccggcgcaggcaccaggcgtttaaggccaccaat |

***infB* cloning:**

p1nusAinfB      tgcgatgcatgcacgtctcggtacaccaaattcccagcagtat  
argRmetYp2      tcgatgcatgctgagcctggatttccgctctcactgaa  
Stag-IF2-1      gcatatgaaagaaaccgctgctgctaaattcgaacgccagcacatggacagcatgacagatgtaa  
                    cgattaaaacgctgg  
IF2BamHI        gtaaggatccttaagcaatggtacgttggatctcg

***priB* and *priC* cloning:**

NdeI-priB        gggcatgcatatgaccaaccgtctggtgtgtcc  
PstI-priB        aaaactgcagctagtctccagaatctatcaattc  
NdeI-priC        gggcatgcatatgaaaaccgcctgtgctgg  
PstI-priC        aaaactgcagctagcgggttaaacgcgctaacc

**Verification of alleles:**

nusLower ( $p_1$ )    gccatggatatgctgccgctgaaaacttc  
rbfUp2 ( $p_2$ )      aactcaatgccctgacgcgcata  
IF2-2.5' int ( $p_2$ ) accgtgacgttgtgatcggcga  
DnaC-Nseq        ttccaccaggattcagagggtaacg  
DnaC-Cseq        gtgtcgcagtataaccgccagaaacgg  
PriA-Nseq        ctgatccgcactcttctacggca  
PriA-Cseq        gaattttc gatccgcctcgca  
PriBupper        tggtcctcctgaccagagcgaac  
PriBlower        gatagcgcgagccagctgacgctg  
PriCupper        ccccatttattctcacttttccgcctcatca  
PriClower        ggccgccagcaggataaacggcgtcgtcgtaa

revPriA820      tcaggccggaatgcagaacttc  
sulAupper      ccatacagtaactcacaggggctgga  
sulAlower      gaaagcattggctggcgacaa  
dinDupper      tcacatggagtgggcaatgaacga  
dinDlower      ccttggttacgcatcgggtgtct

**Site-specific mutagenesis:**

IF2D409E      gtaaaacctctctgctggaatacattcgttcaacgaaag  
IF2D501N      ggttgcaagtgaacaagatcaataaaccagaagctgatcc  
IF2g474c      gtgaagctgcggaaaaagacaaagtcagcaatcaac  
IF2t494c      aagacgatacgactaaaaacgccaggctg

**Construction of *infB(dell)***

delIF2-1UP      aagcgaaacgtgaagctcgggaaaaagac  
delIF2-LOW      ctacagtttattacgcttcgtcaccgaa

---
